# Supplementary material
Source: Elsevier journal article supplement (https://www.sciencedirect.com/science/article/pii/S0213005X20302627)
Supplement: mmc1 [file S0213005X20302627:mmc1.pdf]

## ANEXOS

### Resultados tablas

**Tabla A1. Preliminary studies included but finally excluded**

|                                                                                                                                                                                                                                                                |
|----------------------------------------------------------------------------------------------------------------------------------------------------------------------------------------------------------------------------------------------------------------|
| Bartoszko JJ, Farooqi MAM, Alhazzani W, Loeb M. Medical masks vs N95 respirators for preventing COVID-19 in healthcare workers: A systematic review and meta-analysis of randomized trials. <i>Influenza Other Respir Viruses</i> . 2020 [Epub ahead of print] |
| Sim SW, Moey KS, Tan NC. The use of facemasks to prevent respiratory infection: a literature review in the context of the Health Belief Model. <i>Singapore Med J</i> 2014; 55:160-167                                                                         |
| Bin-Reza F, Lopez Chavarrias V, Nicoll A, Chamberland MA. The use of masks and respirators to prevent transmission of influenza: a systematic review of the scientific evidence. <i>Influenza Other Respir Viruses</i> 2012; 6:257-267                         |
| Rashid H, Booy R, L. Heron, Memish ZA, Nguyen-Van-Tam J, Barasheed O, et al. Unmasking masks in Makkah: preventing influenza at Hajj. <i>Clin Infect Dis</i> 2012; 54:151-153                                                                                  |
| Jefferson T, Del Mar CB, Dooley L, Ferroni E, Al-Ansary LA, Bawazeer GA, et al. Physical interventions to interrupt or reduce the spread of respiratory viruses. <i>Cochrane Database Syst Rev</i> . 2011; 6 (7):CD006207                                      |
| Cowling BJ, Zhou Y, IP Dkm, Leung Gm, Aiello AE. Face masks to prevent transmission of influenza virus: a systematic review. <i>Epidemiology and Infection</i> . Cambridge University Press; 2010;138(4):449–56.                                               |
| Aledort JE, Lurie N, Wasserman J, Bozzette SA. Non-pharmaceutical public health interventions for pandemic influenza: an evaluation of the evidence base. <i>BMC Public Health</i> . 2007;7:208.                                                               |
